# Supplementary material
Source: publisher figshare collection journal article supplement (https://asha.figshare.com/articles/dataset/_/22223785)
Supplement: Supplementary file 2 [file 1]

### Supplemental Material S3. Data extraction sheets.

#### Data extraction sheet 1: Characteristics of the studies

| Author, year, county            | Study characteristics |                                                                 |                                            |             |                                                                                                                                                                                                                                                                                                                                                                                                                                                                                                                                                                                                                                                                 | Demographic details   |            | Clinical characteristics |                                          |                        |                   |                                          |
|---------------------------------|-----------------------|-----------------------------------------------------------------|--------------------------------------------|-------------|-----------------------------------------------------------------------------------------------------------------------------------------------------------------------------------------------------------------------------------------------------------------------------------------------------------------------------------------------------------------------------------------------------------------------------------------------------------------------------------------------------------------------------------------------------------------------------------------------------------------------------------------------------------------|-----------------------|------------|--------------------------|------------------------------------------|------------------------|-------------------|------------------------------------------|
|                                 | Study design          | Setting                                                         | Period                                     | Sample size | Inclusion and exclusion criteria of participants                                                                                                                                                                                                                                                                                                                                                                                                                                                                                                                                                                                                                | Age                   | Sex        | Etiology /lesion         | Severity of apraxia                      | Length of the disorder | Diagnostic rating | Presence of other communication disorder |
| Ballard et al., 2019, Australia | SCED                  | Home and clinic                                                 | 4 weeks                                    | 5           | 1) Chronic AOS; 2) No prior history of speech; 3) language or reading disorder; 4) Absence of other neurological disorder; 5) Negative histories for alcohol and/or substance abuse; 6) English speakers; 7) No hearing loss; 8) Having iPad; 9) competent to navigate apps                                                                                                                                                                                                                                                                                                                                                                                     | 60 to 73 years        | 4 M<br>1 F | 4 L/CVA<br>1 R/CVA       | 2 mild,<br>2 mild-moderate<br>1 moderate | More than 6 months     | A                 | Anomic or Broca's aphasia                |
| Bislick, 2020, USA              | SCED                  | Aphasia and Related Conditions Research Laboratory space at UCF | 12.5 weeks for P1 and 9 weeks 1 day for P2 | 2           | 1) Right handed; 2) use English as a primary language; 3) minimum of high school education; 4) passed an audiometric pure tone, air conduction screening at 35 dB HL at 500, 1000, and 2000 Hz for at least one ear; 5) normal or corrected to normal visual acuity (20/20 to 20/40) as determined by a vision screen (Tumbling E eye chart); 6) score above a 23/36 on the Raven's Colored Progressive Matrices; (7) demonstrate sufficient auditory comprehension to participate in the study; 8) negative medical history of untreated depression or other psychiatric illness, degenerative neurological illnesses, chronic medical illness, or dysarthria. | 46 years and 61 years | 2 M        | 2 L/CVA                  | 1 mild-moderate,<br>1 moderate-severe    | 134 months-84 months   | A                 | Aphasia                                  |
| Bislick et al., 2014, USA       | SCED                  | Home                                                            | 6 weeks                                    | 1           | L/CVA                                                                                                                                                                                                                                                                                                                                                                                                                                                                                                                                                                                                                                                           | 38 years              | 1 M        | 1 L/CVA                  | 1 severe                                 | 22 months              | A                 | Aphasia                                  |
| Farias et al., 2014, USA        | SCED                  | NR                                                              | 4 weeks                                    | 1           | 1) AOS as primary diagnosis; 2) normal hearing and vision; 3) no dysarthria                                                                                                                                                                                                                                                                                                                                                                                                                                                                                                                                                                                     | 56 years              | 1 M        | 1 L/CVA                  | 1 mild-moderate                          | 6 months               | B                 | Aphasia                                  |
| Haley et al., 2021, USA         | SCED                  | Home at the kitchen table                                       | 36 weeks                                   | 1           | 1) Chronic AOS; 2) normal hearing                                                                                                                                                                                                                                                                                                                                                                                                                                                                                                                                                                                                                               | 60 years              | 1 F        | 1 L/CVA                  | 1 moderate-severe                        | 8 or 9 years           | B                 | Non-fluent aphasia                       |

| Author, year, county               | Study characteristics |                       |                                     |             |                                                                                                                                                                                                                                                                                                                                                                                                                             | Demographic details |          | Clinical characteristics           |                                 |                             |                   |                                                               |
|------------------------------------|-----------------------|-----------------------|-------------------------------------|-------------|-----------------------------------------------------------------------------------------------------------------------------------------------------------------------------------------------------------------------------------------------------------------------------------------------------------------------------------------------------------------------------------------------------------------------------|---------------------|----------|------------------------------------|---------------------------------|-----------------------------|-------------------|---------------------------------------------------------------|
|                                    | Study design          | Setting               | Period                              | Sample size | Inclusion and exclusion criteria of participants                                                                                                                                                                                                                                                                                                                                                                            | Age                 | Sex      | Etiology /lesion                   | Severity of apraxia             | Length of the disorder      | Diagnostic rating | Presence of other communication disorder                      |
| Hurkmans et al, 2015, Netherland   | Case series           | Rehabilitation center | 12 to 20 weeks                      | 5           | 1) age between 18 and 75; 2) speech problems due to stroke; 3) no language or articulation disorders before stroke; 4) normal or adjusted-to-normal hearing; 5) between 3- and 6-months post-stroke; 6) diagnosis of AOS on the basis of the DIAS (Feiken & Jonkers, 2012); 7) no previous SMTA treatment                                                                                                                   | 47-72 years         | 4M<br>1F | 5 L/CVA                            | 3 mild<br>2 severe              | 3-6 months                  | B                 | 1 global aphasia<br>3 Broca's aphasia<br>1 Wernicke's aphasia |
| Johnson, 2018, USA                 | SCED                  | University clinic     | 12 weeks                            | 2           | 1) Individuals who had difficulty producing speech following a stroke or brain injury ; 2) between the ages of 18 and 85; 3) at least 1 year post onset of a left hemisphere stroke or accident; 4) a native English speaker; 5) have adequate hearing and vision.                                                                                                                                                          | 61 and 55 years     | 2 M      | 1 L/CVA 1 bilateral embolic stroke | 2 moderate-severe               | 19 and 28 months            | B                 | Broca's aphasia                                               |
| Johnson, Lasker, et al., 2018, USA | Case study            | Home, via skype       | Cycle 1-10 weeks<br>Cycle 2-7 weeks | 1           | NR                                                                                                                                                                                                                                                                                                                                                                                                                          | 52 years            | 1 M      | 1 L/CVA                            | 1 moderate-severe               | 5 months                    | B                 | Broca's aphasia                                               |
| Johnson, Lott, et al., 2018, USA   | SCED                  | NR                    | 9 weeks                             | 2           | Normal hearing and vision                                                                                                                                                                                                                                                                                                                                                                                                   | 61 and 68 years     | 2 M      | 2 L/CVA                            | 1 moderate<br>1 moderate-severe | 91 and 86 months            | B                 | Transcortical motor aphasia<br>Broca's aphasia                |
| Jungblut et al., 2014, Germany     | SCED                  | Institute             | 25 weeks                            | 3           | 1) German speaking; 2) 18 months after the incident; 3) no premorbid history of neurological or psychiatric problems; 4) no perceptual hearing impairments and sufficient auditory comprehension to understand the instructions; 5) good capacity regarding concentration and attention and general health condition stable enough for continuous participation during the 6-month treatment period of this research study. | 44-53 years         | 2M<br>1F | 3 L/CVA                            | 1 moderate<br>2 severe          | 18 months                   | A                 | 1 Broca's aphasia, 2 global aphasia                           |
| Marangolo et al., 2013, Italy      | Group experimental    | NR                    | Speech therapy for 10 days          | 8           | 1) Native Italian proficiency; 2) pre-morbid right-handedness (based on the Edinburgh Handedness Questionnaire; Oldfield, 1971); 3) a single left hemispheric stroke at least 6 months prior to the investigation; 4) no acute or chronic neurological symptoms requiring medication.                                                                                                                                       | 37-68 years         | 4M<br>4F | 8 L/CVA                            | NR                              | 6 months to 6 year 2 months | B                 | Aphasia                                                       |

| Author, year, county                  | Study characteristics |                                           |                                                |             |                                                                                                                                                                                                                                                                                                                                                       | Demographic details                                                |              | Clinical characteristics |                                                                      |                        |                   |                                          |
|---------------------------------------|-----------------------|-------------------------------------------|------------------------------------------------|-------------|-------------------------------------------------------------------------------------------------------------------------------------------------------------------------------------------------------------------------------------------------------------------------------------------------------------------------------------------------------|--------------------------------------------------------------------|--------------|--------------------------|----------------------------------------------------------------------|------------------------|-------------------|------------------------------------------|
|                                       | Study design          | Setting                                   | Period                                         | Sample size | Inclusion and exclusion criteria of participants                                                                                                                                                                                                                                                                                                      | Age                                                                | Sex          | Etiology /lesion         | Severity of apraxia                                                  | Length of the disorder | Diagnostic rating | Presence of other communication disorder |
| Mauszycki, Nessler, et al., 2016, USA | SCED                  | Home                                      | ~13 weeks                                      | 2           | 1) Passing a pure tone hearing screening at 35 dB at 500, 1000, and 2000 Hz for at least one ear, unaided; 2) performance within normal limits on the test of nonverbal intelligence-3; 3) self-reported negative histories for alcohol and substance abuse and neurological conditions other than stroke, verified through existing medical records. | 51 and 53 years                                                    | 1M<br>1M     | 2 L/CVA                  | 2 moderate                                                           | 76 & 237 months        | A                 | Broca's aphasia                          |
| Mauszycki & Wambugh, 2020 USA         | SCED                  | Participant's home or research laboratory | 8 weeks                                        | 2           | 1) Normal hearing; 2) normal performance on the Test of Nonverbal Intelligence-Fourth Edition; 3) negative histories for alcohol or substance abuse, psychological disorders, and neurological conditions; 4) not receiving any other speech therapy services during their participation in this study                                                | 73 and 40 years                                                    | 1 M<br>1 F   | 1 L/CVA<br>1 L/GSW       | 1 severe<br>1 moderate                                               | 30 and 53 months       | A                 | Broca's aphasia                          |
| Mauszycki et al., 2016 USA            | SCED                  | Participant's home or research laboratory | (Varies)                                       | 4           | 1) Normal hearing in one ear aided or unaided; 2) performance within normal limits on the test of nonverbal intelligence-4; 3) negative histories for alcohol or substance abuse, psychological disorders, and neurological conditions; 4) not receiving speech therapy for AOS during research                                                       | 37 to 57 years                                                     | 2 M<br>2 F   | 3 L/CVA 1 GSW            | 2 moderate<br>2 moderate-severe                                      | 12-113 months          | A                 | Broca's aphasia                          |
| Mozeiko et al., 2019                  | Case study            | University speech and hearing clinic      | 2 weeks                                        | 1           | 1) A native English speaker with no reported history of language disorder, substance abuse, or neurological or psychological conditions; 2) passing a pure-tone hearing screening at 35 dB in each ear                                                                                                                                                | 51 years                                                           | 1M           | 1 L/CVA                  | 1 severe                                                             | 3.6 years              | B                 | Broca's aphasia                          |
| Preston & Leaman, 2014, USA           | Case study            | Clinic room or participant's home         | 6 weeks                                        | 1           | NR                                                                                                                                                                                                                                                                                                                                                    | 59 years                                                           | 1F           | 1 L/CVA                  | 1 moderate-severe                                                    | 14.5 months            | B                 | Residual aphasia                         |
| Varley et al., 2016, UK               | RCT                   | Homes                                     | Speech 6 weeks<br>Sham 6 weeks<br>rest 4 weeks | 50          | 1) Adults with chronic AOS (at least 5 months post onset of apraxic stroke); 2) unilateral left hemisphere lesion(s); 3) the absence of neurodegenerative condition; 4) premonitory competence in English; 5) sufficient auditory/visual acuity to interact with a laptop                                                                             | Speech first group-28 to 91 years, sham first group-36 to 86 years | 29 M<br>21 F | 50 L/CVA                 | Score given out of 20. Speech first group=0-11, sham first group=0-9 | At least 5 months      | A                 | Aphasia                                  |

| Author, year, country               | Study characteristics     |                                                                    |                                                                              |             |                                                                                                                                                                                                                                                                                                                                                                  | Demographic details |             | Clinical characteristics |                                                     |                        |                   |                                             |
|-------------------------------------|---------------------------|--------------------------------------------------------------------|------------------------------------------------------------------------------|-------------|------------------------------------------------------------------------------------------------------------------------------------------------------------------------------------------------------------------------------------------------------------------------------------------------------------------------------------------------------------------|---------------------|-------------|--------------------------|-----------------------------------------------------|------------------------|-------------------|---------------------------------------------|
|                                     | Study design              | Setting                                                            | Period                                                                       | Sample size | Inclusion and exclusion criteria of participants                                                                                                                                                                                                                                                                                                                 | Age                 | Sex         | Etiology /lesion         | Severity of apraxia                                 | Length of the disorder | Diagnostic rating | Presence of other communication disorder    |
| Wambugh et al., 2016, USA           | SCED                      | Participants home or research laboratory                           | P1, 2-6 weeks, P3, 4-13 weeks                                                | 4           | 1) Chronic AOS and Broca's aphasia; 2) left hemisphere stroke; 3) absence of other neurological disorder; 4) negative histories for alcohol and/or substance abuse; 5) English speakers; 6) no hearing loss                                                                                                                                                      | 37 to 83 years      | 2 M<br>2 F  | 4 L/CVA                  | 1 mild<br>3 mild-moderate                           | 17-259 months          | A                 | Broca's aphasia                             |
| Wambugh, Nessler, et al., 2014, USA | SCED                      | Participant's home, research laboratory, or university clinic      | ~13 weeks                                                                    | 6           | 1) Normal hearing at least one ear, aided or unaided; 2) demonstrating performance within normal limits on the test of nonverbal intelligence-4; 3) negative histories for alcohol or substance abuse, psychological disorders, and neurological conditions other than stroke; 4) not receiving any other speech/language therapy during the course of the study | 46 to 71 years      | 5 M<br>1 F  | 6 L/CVA                  | 2 moderate<br>3 moderate-severe<br>1 severe         | 28-87 months           | A                 | Broca's aphasia, dysarthria                 |
| Wambugh et al., 2013, USA           | SCED                      | Participants home or research laboratory                           | Intense 4 weeks<br>Traditional 5.5 weeks<br>For all Follow up 4 weeks        | 4           | 1) Chronic AOS and Broca's aphasia; 2) single episode of stroke; 3) absence of other neurological disorders and psychological disorders; 4) negative histories for alcohol and/or substance abuse; 5) English speakers; 6) no hearing loss; not receiving speech therapy other than this                                                                         | 34 to 53 years      | 3 M<br>1 F  | 4 L/CVA                  | 1 mild-moderate,<br>2 moderate<br>1 moderate-severe | 1.5-20 years           | A                 | Broca's aphasia                             |
| Wambugh et al., 2017, USA           | SCED + Group experimental | Participant's residence, research laboratory, or university clinic | 2 phases<br>P5, P15<br>10 sessions per phase<br>others 20 sessions per phase | 20          | 1) Native speakers of English; 2) normal hearing at least one ear or, when aided; 3) negative histories for alcohol and/or substance abuse and neurological conditions other than stroke; 4) not receiving other speech therapy during this study; 5) performing within normal limits on the Test of Nonverbal Intelligence-Fourth Edition                       | 29 to 83 years      | 13 M<br>7 F | 19 CVA<br>1 GSW          | Range from mild to severe                           | 6-259 months           | A                 | Broca's aphasia, anomic aphasia, dysarthria |
| Wambugh et al., 2021, USA           | SCED                      | Participant's home, research laboratory, or university clinic      | 2 phases<br>P5, P15<br>10 sessions per phase<br>others 20 sessions per phase | 20          | 1) Native speakers of English; 2) normal hearing at least one ear or, when aided; 3) negative histories for alcohol and/or substance abuse and neurological conditions other than stroke; 4) not receiving other speech therapy during this study; 5) performing within normal limits on the Test of Nonverbal Intelligence-Fourth Edition                       | 29 to 83 years      | 13 M<br>7 F | 19 CVA<br>1 GSW          | Range from mild severe                              | 6-259 months           | A                 | Broca's aphasia or anomic aphasia           |

| Author, year, county                          | Study characteristics |                                                                 |                                                              |             |                                                                                                                                                                                                                                                                                                                                                                                                                                                                                                                                                                                                                                                                                                                                                                                                                                                                                                                                                         | Demographic details |            | Clinical characteristics |                                                |                        |                   |                                          |
|-----------------------------------------------|-----------------------|-----------------------------------------------------------------|--------------------------------------------------------------|-------------|---------------------------------------------------------------------------------------------------------------------------------------------------------------------------------------------------------------------------------------------------------------------------------------------------------------------------------------------------------------------------------------------------------------------------------------------------------------------------------------------------------------------------------------------------------------------------------------------------------------------------------------------------------------------------------------------------------------------------------------------------------------------------------------------------------------------------------------------------------------------------------------------------------------------------------------------------------|---------------------|------------|--------------------------|------------------------------------------------|------------------------|-------------------|------------------------------------------|
|                                               | Study design          | Setting                                                         | Period                                                       | Sample size | Inclusion and exclusion criteria of participants                                                                                                                                                                                                                                                                                                                                                                                                                                                                                                                                                                                                                                                                                                                                                                                                                                                                                                        | Age                 | Sex        | Etiology /lesion         | Severity of apraxia                            | Length of the disorder | Diagnostic rating | Presence of other communication disorder |
| Wambugh, Wright, Boss, et al., 2018, USA      | SCED                  | Participants home or research laboratory                        | Intense- 3 weeks No treatment- 2 weeks Traditional - 9 weeks | 5           | 1) Chronic AOS and aphasia; 2) absence of other neurological disorders; 3) negative histories for alcohol and/or substance abuse; 4) English speakers; 5) no hearing loss; not receiving speech therapy other than this                                                                                                                                                                                                                                                                                                                                                                                                                                                                                                                                                                                                                                                                                                                                 | 44 to 64 years      | 5 M        | 5 L/CVA                  | 2 moderate, 2 moderate-severe, 1 severe        | 14-228 months          | A                 | Broca's aphasia or conduction aphasia    |
| Wambugh, Wright, Mauszycki, et al., 2018, USA | SCED                  | Homes or the VA lab                                             | Ps-1,3,4 40-45 hours P2 – 60-68 hours                        | 4           | 1) Native English speakers with self-reported negative histories for alcohol or substance abuse and neurological conditions other than the condition that resulted in aphasia; 2) normal hearing for at least one ear, unaided; 3) none of the participants received any other speech/language therapy during this investigation                                                                                                                                                                                                                                                                                                                                                                                                                                                                                                                                                                                                                        | 39 to 69 years      | 2 M<br>2 F | 3 L/CVA 1 GSW            | 2 mild-moderate 2 moderate-severe              | 26-103 months          | A                 | Broca's aphasia                          |
| Wambugh, Wright, et al., 2014, USA            | SCED                  | Homes, a clinic setting, or a social rehabilitation day program | P1--9 weeks, P2,3,4--13 weeks                                | 4           | 1) Native English speakers with self-reported negative histories for alcohol or substance abuse and neurological conditions other than the condition that resulted in aphasia; 2) pass a pure tone hearing screen at least 1 ear unaided                                                                                                                                                                                                                                                                                                                                                                                                                                                                                                                                                                                                                                                                                                                | 36 to 72 years      | 4 M        | 4 L/CVA                  | 1 mild-moderate, 2 moderate, 1 moderate-severe | 12-255 months          | A                 | Anomic and Broca's aphasia               |
| Wambugh et al., 2020, USA                     | SCED                  | Participant's residence or research laboratory                  | Intense 3 week Traditional 9 weeks                           | 12          | 1) Native speakers of English; 2) negative histories for alcohol/substance abuse and neurological conditions other than stroke; 3) passing a pure tone hearing screening for at least one ear, unaided within normal limits on the Test of Nonverbal Intelligence– Fourth Edition<br>Exclusion criteria: 1) no AOS symptoms or AOS sound errors too infrequent to develop sufficient numbers of treatment stimuli; 2) history of neurological condition other than stroke; 3) psychopathology; 4) a score $\geq 10$ on the Geriatric Depression Scale–Short Form; 5) treatment for AOS in the 2 months preceding application of treatment in this study; 6) dysarthria as defined by Duffy (2013); 7) premorbid history of speech/language problems as adults; 8) participation in any other speech/language therapy during the time of the planned investigation; 9) ability/willingness to adhere to the intense and non-intense treatment schedules. | 43 to 81 years      | 8 M<br>4 F | 12 L/CVA                 | Score of ASRS ranged between 16-30             | 9-163 months           | A                 | Anomic and Broca's aphasia               |
| Zumbansen et al, 2014, Canada                 | Case series           | NR                                                              | 6 weeks                                                      | 3           | 1) Native French-speaking, right-handed men with aphasia; 2) had experienced a single ischemic unilateral left hemisphere cerebrovascular accident more than 1 year prior to their involvement in the study and had been                                                                                                                                                                                                                                                                                                                                                                                                                                                                                                                                                                                                                                                                                                                                | 48-57 years         | 3M         | 3 L/CVA                  | NR                                             | 20-24 months           | C                 | Broca's aphasia                          |

| Author,<br>year,<br>county | Study characteristics |         |        |                |                                                                                                                                                                                                                                                                                                                                                                          | Demographic<br>details |     | Clinical characteristics |                        |                              |                      |                                                       |
|----------------------------|-----------------------|---------|--------|----------------|--------------------------------------------------------------------------------------------------------------------------------------------------------------------------------------------------------------------------------------------------------------------------------------------------------------------------------------------------------------------------|------------------------|-----|--------------------------|------------------------|------------------------------|----------------------|-------------------------------------------------------|
|                            | Study<br>design       | Setting | Period | Sample<br>size | Inclusion and exclusion criteria of participants                                                                                                                                                                                                                                                                                                                         | Age                    | Sex | Etiology<br>/lesion      | Severity of<br>apraxia | Length of<br>the<br>disorder | Diagnostic<br>rating | Presence of<br>other<br>communica<br>tion<br>disorder |
|                            |                       |         |        |                | through the standard public rehabilitation services, which commonly discharge aphasic patients when their language improvements reach a plateau; 3) had not received any speech-language therapy; 4) had not experienced neurological or psychiatric problems before the stroke; 5) an examination by a certified audiologist attested that they had no hearing deficit. |                        |     |                          |                        |                              |                      |                                                       |

## Data extraction sheet 2: Characteristics of the intervention

| Study                 | Intervention characteristics                     |                                       |                                                                                                                                                                                                                                                                                                                                                                                                                                                                                                                                                                                                                                                                                                                                                                                                                                                                                                                                                                                                                                                                                                                                                                                                                                                                                                                                                                                                                                                  |                                 |                                 |                                                     |                                                                                                    |                         |                           |                          |
|-----------------------|--------------------------------------------------|---------------------------------------|--------------------------------------------------------------------------------------------------------------------------------------------------------------------------------------------------------------------------------------------------------------------------------------------------------------------------------------------------------------------------------------------------------------------------------------------------------------------------------------------------------------------------------------------------------------------------------------------------------------------------------------------------------------------------------------------------------------------------------------------------------------------------------------------------------------------------------------------------------------------------------------------------------------------------------------------------------------------------------------------------------------------------------------------------------------------------------------------------------------------------------------------------------------------------------------------------------------------------------------------------------------------------------------------------------------------------------------------------------------------------------------------------------------------------------------------------|---------------------------------|---------------------------------|-----------------------------------------------------|----------------------------------------------------------------------------------------------------|-------------------------|---------------------------|--------------------------|
|                       | Type of intervention                             | Materials & measurement tools used    | Procedure                                                                                                                                                                                                                                                                                                                                                                                                                                                                                                                                                                                                                                                                                                                                                                                                                                                                                                                                                                                                                                                                                                                                                                                                                                                                                                                                                                                                                                        | People involved                 | Mode of delivery                | No. of sessions                                     | Schedule                                                                                           | Duration of one session | Duration of follow up     | Intensity or dose        |
| Ballard et al., 2019, | Tablet-based word training app with ASR software | iPad with the app installed, computer | Each session involved cycling once through the 20 pictures, following the on screen prompts for supportive cues and requests for naming. Each trial for a given word involved a series of steps/screens including (a) a presentation of the picture with the written question “Do you recognize the picture?” and yes/no response buttons; (b) an opportunity to record a naming attempt by tapping the record icon on the screen and producing a response within the 5 s recording window; (c) a semantic loop to facilitate naming, including a category cue (four response buttons to select the object’s category, e.g., fruit vs. three foils) and a use cue (four response buttons to select a common use for the object, e.g., cooking vs. three foils); and (d) a phonological loop, including an orthographic cue (four response buttons to select the object’s first letter, e.g., P vs. three foils), a prerecorded auditory cue of the initial consonant and vowel (e.g., “ap” for apple), and a prerecorded whole word model for imitation. After every response selection, the participant is again given the opportunity to record a naming attempt. Hence, for any given word trial, one word production would be recorded if the attempt was judged as correct, or multiple productions would be recorded until a “correct” decision was delivered or the participant selected the “skip” function to move on to the next word. | SLPs                            | Face-to-face and through an app | 80                                                  | 1 session per day for 4 times a week or in any configuration on that suited participants’ schedule | 1 hour                  | 1 month                   | Traditional/ non-intense |
| Bislick, 2020         | Phonomotor Treatment                             | Communicative Participation Item Bank | Stage 1 begins with sounds in isolation, and Stage 2 combines sounds to make more complex productions. Treatment tasks including motor description, speech production, speech perception, and, if appropriate, grapheme to phoneme correspondence are implemented at each difficulty level                                                                                                                                                                                                                                                                                                                                                                                                                                                                                                                                                                                                                                                                                                                                                                                                                                                                                                                                                                                                                                                                                                                                                       | SLP, student research assistant | Individual, face-to-face        | P1 Phase 1-24, Phase 2-14; P2 Phase 1-22, Phase 2-6 | 3 days a week for a 1-hour session each day                                                        | 1 hour                  | P1-10 weeks<br>P2-8 weeks | NR                       |

| Study                | Intervention characteristics     |                                                                                                                                                                                        |                                                                                                                                                                                                                                                                                                                                                                                                                                                                                                                                                                                                                                                                                                                                                                   |                                                        |                                              |                 |                                                         |                                                                                                                                      |                       |                   |
|----------------------|----------------------------------|----------------------------------------------------------------------------------------------------------------------------------------------------------------------------------------|-------------------------------------------------------------------------------------------------------------------------------------------------------------------------------------------------------------------------------------------------------------------------------------------------------------------------------------------------------------------------------------------------------------------------------------------------------------------------------------------------------------------------------------------------------------------------------------------------------------------------------------------------------------------------------------------------------------------------------------------------------------------|--------------------------------------------------------|----------------------------------------------|-----------------|---------------------------------------------------------|--------------------------------------------------------------------------------------------------------------------------------------|-----------------------|-------------------|
|                      | Type of intervention             | Materials & measurement tools used                                                                                                                                                     | Procedure                                                                                                                                                                                                                                                                                                                                                                                                                                                                                                                                                                                                                                                                                                                                                         | People involved                                        | Mode of delivery                             | No. of sessions | Schedule                                                | Duration of one session                                                                                                              | Duration of follow up | Intensity or dose |
| Bislick et al., 2014 | Phonomotor Treatment             | SAQOL-39<br>ASHA FACS<br>HD camcorder                                                                                                                                                  | Practicing sounds in isolation (Stage one), to single-syllable sound combinations (CV, VC, and CVC; Stage two) and beyond to longer syllable combinations (Stage three). Three sounds in isolation were introduced to the participant upon treatment initiation (described in detail in the next section). A new sound was introduced after every 4 to 8 hours of treatment (stimuli selection are discussed below). Each treatment session began with a blocked practice schedule. In other words, the participant was asked to produce sounds in isolation in consecutive blocks (AAAAA, BBBB, CCCC). Once the participant was able to successfully produce sounds in isolation, approximately five times consecutively, treatment moved on to random practice. | SLPs, a student with Bachelor’s degrees in linguistics | Individual, face-to-face                     | 48              | 6 weeks, 4 days a week, for 2 hours a day, for 48 hours | 1 hour                                                                                                                               | 2 months              | NR                |
| Farias et al., 2014  | Implicit phoneme manipulation.   | Recorder                                                                                                                                                                               | Encourage the participant to covertly manipulate phonemes to create a new word, and to associate this newly formed word to a target picture among 4 choices.                                                                                                                                                                                                                                                                                                                                                                                                                                                                                                                                                                                                      | SLPs                                                   | Individual, face-to-face                     | 12              | 3 times a week for 1–1.5 hours                          | 1-1.5 hours                                                                                                                          | 6 week                | NR                |
| Haley et al., 2021   | ActionSC treatment.              | Tablet computer equipped with a custom app, written instructions for login and navigation, a notepad for study related communication purposes A paper log for tracking practice goals. | 3 conversation topics were selected. Record video cues for the 10 phrases that were treated in the first conversation topic about movies were executed within the app by tapping one of the three video cue place holders. LB and the clinician reviewed her practice log and discussed how the practice had unfolded since they last saw each other. Next, LB guided the clinician to challenges and accomplishments by demonstrating phrases and cues she had worked on.                                                                                                                                                                                                                                                                                        | 2 clinicians                                           | Face-to-face and self-administering with app | 31              | 2-3 times per day                                       | 43 minutes actively using the app on session dates and 24 minutes actively using the app each day she practiced on non-session days. | 3 and 4 weeks         | NR                |
| Hurkmans et al, 2015 | Speech–Music Therapy for Aphasia | Video and audio recorders                                                                                                                                                              | Each SMTA session started with warming up of the voice for approximately 2 min. Then, the speech therapy line of treatment (i.e., phoneme, word and sentence level) was followed, depending on the degree of the speech problem and target objectives. Therefore, this line of treatment was variable per participant. In contrast, all participants                                                                                                                                                                                                                                                                                                                                                                                                              | SLPs                                                   | Individual, face-to-face                     | 24              | Two SMTA sessions per week                              | 30 minutes                                                                                                                           | 3 months              | NR                |



| Study                         | Intervention characteristics    |                                                                                                                          |                                                                                                                                                                                                                                                                                                                                                                                                                                                                                                                                                                                                                                                                                                                                                                                                                                                                                                                                                          |                 |                                                |                                                                                                                            |                                                            |                                                                                          |                                                   |                   |
|-------------------------------|---------------------------------|--------------------------------------------------------------------------------------------------------------------------|----------------------------------------------------------------------------------------------------------------------------------------------------------------------------------------------------------------------------------------------------------------------------------------------------------------------------------------------------------------------------------------------------------------------------------------------------------------------------------------------------------------------------------------------------------------------------------------------------------------------------------------------------------------------------------------------------------------------------------------------------------------------------------------------------------------------------------------------------------------------------------------------------------------------------------------------------------|-----------------|------------------------------------------------|----------------------------------------------------------------------------------------------------------------------------|------------------------------------------------------------|------------------------------------------------------------------------------------------|---------------------------------------------------|-------------------|
|                               | Type of intervention            | Materials & measurement tools used                                                                                       | Procedure                                                                                                                                                                                                                                                                                                                                                                                                                                                                                                                                                                                                                                                                                                                                                                                                                                                                                                                                                | People involved | Mode of delivery                               | No. of sessions                                                                                                            | Schedule                                                   | Duration of one session                                                                  | Duration of follow up                             | Intensity or dose |
|                               |                                 |                                                                                                                          | followed the same MT line of treatment (i.e., singing, rhythmical chanting and speaking). Each target item was trained within this structure. The content of the treatment (i.e., level of the speech therapy line of treatment and the use of various musical elements) and the selection of target items were decided by the speech therapist and music therapist and was not standardized by the investigators of this study. Each target item was practiced until the participant was able to produce it fluently without the therapist's help.                                                                                                                                                                                                                                                                                                                                                                                                      |                 |                                                |                                                                                                                            |                                                            |                                                                                          |                                                   |                   |
| Johnson, 2018                 | Motor learning guided treatment | 11 point multi-dimensional rating scale, modified survey of communicative effectiveness<br>Panasonic V750 video recorder | In Treatment Cycle 1, 15 of the phrases were programed into their system with a single target item stored under a single button. When the participant pressed a specific area on the system, identified by the written target item, a target utterance was 'spoken' aloud by the device for the participant to practice independently at home on non-therapy days. The participants were provided written instructions to follow for the self-controlled practice of the targets at home using the MLG steps (minus augmented feedback). In place of the clinician's modeled productions the instructions were to press the button on the device to hear the target phrase. The number of productions and pause time between productions remained the same. Participants were asked to record the amount of time spent practicing daily on a paper calendar. Additionally, the number of 'hits' per phrase was recorded on the speech generating device. | SLPs            | Face-to-face and self-controlled home practice | -                                                                                                                          | Twice a week                                               | 60 minutes                                                                               | 10 months post-treatment                          | High and low dose |
| Johnson, Lasker, et al., 2018 | Motor learning guided treatment | Speech generating device, 11-point multidimensional rating scale                                                         | MLG protocol was used (appendix)<br>Each treatment cycle used three conditions of practice: high dose (clinician trained + self-controlled practice), low dose (clinician trained only) and untreated (untreated). Once the high dose set reached criterion for mastery, training and self-controlled practice of these phrases concluded and the treatment focus turned to training with the low dose set (no self-controlled practice) only. Once the low dose set reached criterion for mastery, training of this set of phrases concluded. Finally, treatment of the untreated phrases began until criterion for mastery was met.                                                                                                                                                                                                                                                                                                                    | SLP Spouse      | Via skype                                      | To reach mastery, Cycle 1, 9, 12 and 7<br>Cycle 2, 4, 6 and 7 sessions for high dose, low dose and untrained respectively. | Twice a week by therapist, Self-controlled practice varies | Self-controlled practiced on high dose, Cycle 1, 10-50 minutes<br>Cycle 2, 20-60 minutes | 1- & 6-months post cycle 1, 3 months post cycle 2 | High and low dose |
| Johnson, Lott, et al., 2018   | Motor learning guided treatment | Panasonic HC V750 video recorder 11 point                                                                                | Stage 1: Written presentation of the stimuli accompanied by a clinician model. After the model, the participant produced the stimuli followed by a blank screen for 4 seconds. The participant's productions and pause time was                                                                                                                                                                                                                                                                                                                                                                                                                                                                                                                                                                                                                                                                                                                          | Clinicians      | Individual, face-to-face                       | 18                                                                                                                         | 2 times a week for 9 weeks                                 | 30 minutes                                                                               | 10 months                                         | NR                |

| Study                            | Intervention characteristics                                      |                                                                                                                                                      |                                                                                                                                                                                                                                                                                                                                                                                                                                                                                                                                                                                                                                                                                                                                                                                                                                                                        |                             |                          |                                 |                           |                         |                       |                   |
|----------------------------------|-------------------------------------------------------------------|------------------------------------------------------------------------------------------------------------------------------------------------------|------------------------------------------------------------------------------------------------------------------------------------------------------------------------------------------------------------------------------------------------------------------------------------------------------------------------------------------------------------------------------------------------------------------------------------------------------------------------------------------------------------------------------------------------------------------------------------------------------------------------------------------------------------------------------------------------------------------------------------------------------------------------------------------------------------------------------------------------------------------------|-----------------------------|--------------------------|---------------------------------|---------------------------|-------------------------|-----------------------|-------------------|
|                                  | Type of intervention                                              | Materials & measurement tools used                                                                                                                   | Procedure                                                                                                                                                                                                                                                                                                                                                                                                                                                                                                                                                                                                                                                                                                                                                                                                                                                              | People involved             | Mode of delivery         | No. of sessions                 | Schedule                  | Duration of one session | Duration of follow up | Intensity or dose |
|                                  |                                                                   | multidimensional rating scale                                                                                                                        | repeated 3 times. After the third production, the clinician provided a modeled production of the stimuli followed by knowledge of results feedback. This was repeated for all five of the stimuli. Stage 2: the process was the same with the exception of no initial clinician model Stage 3 of the treatment protocol, the process was the same as Stage 2; only the pause time between productions was increased to 10 seconds                                                                                                                                                                                                                                                                                                                                                                                                                                      |                             |                          |                                 |                           |                         |                       |                   |
| Jungblut et al., 2014, Germany   | Rhythmic-melodic voice training                                   | MR scanner and MR-compatible headphones                                                                                                              | Procedure is given elsewhere                                                                                                                                                                                                                                                                                                                                                                                                                                                                                                                                                                                                                                                                                                                                                                                                                                           | Singer, percussionist, SLPs | Individual, face-to-face | 50                              | Twice a week              | 60 minutes              | NR                    | NR                |
| Marangolo et al., 2013           | Transcranial direct current stimulation + speech-language therapy | A battery driven Eldith (NeuroConn GmbH, Germany) Programmable Direct Current Stimulator with a pair of surface-soaked sponge electrodes (5 9 7 cm). | Step 1: The clinician auditorily presented the whole stimulus and asked the patient to repeat it. If the patient correctly repeated the stimulus, the clinician would present another stimulus but if he or she made errors the clinician would move on to the next step. Step 2: The clinician auditorily presented the stimulus with a pause between syllables, prolonged the vowel sound, exaggerated the articulatory gestures and asked the patient to do the same. Step 3: As in step 2, the clinician auditorily presented the stimulus, again with a pause between syllables, prolonged the vowel sound, exaggerated the articulatory gestures and asked the patient to do the same. Step 4: The clinician auditorily presented one syllable at a time, prolonged the vowel sound, exaggerated the articulatory gestures and asked the patient to do the same. | SLPs                        | Individual, face-to-face | 10                              | Every weekday for 10 days | NR                      | 1 week                | NR                |
| Mauszycki, Nessler, et al., 2016 | Melodic intonation therapy                                        | Audio recorder                                                                                                                                       | Appendix 3 and appendix 4                                                                                                                                                                                                                                                                                                                                                                                                                                                                                                                                                                                                                                                                                                                                                                                                                                              | SLPs                        | Individual, face-to-face | 20 per each item set            | 3 times a week            | 45-60 minutes           | 2, 4 & 6 weeks        | NR                |
| Mauszycki & Wambaugh, 2020       | Electropalatography treatment and Sound Production Treatment      | Audio recorder                                                                                                                                       | Step 1: The speech language pathologist (SLP) provided a verbal-visual model of the word or phrase and requested a repetition. Step 2: The SLP used printed letters or words to identify the speech sound in error, instructed the participant to focus on the target sound, provided another verbal model, and requested a repetition. Step 3: The SLP used integral stimulation “watch me, listen to me, say it with me” to elicit simultaneous production with a maximum of three attempts to elicit a correct production. Step 4: The SLP provided articulatory cueing appropriate for the speech sound production error and then repeated the procedures used in the previous step. Articulatory                                                                                                                                                                  | SLP                         | Individual, face-to-face | Phase 1-8, phase 2-8, phase 3-8 | 3 times a week            | 50-60 minutes           | 2,6,10 weeks          | NR                |

| Study                           | Intervention characteristics                                                                    |                                              |                                                                                                                                                                                                                                                                                                                                                                                                                                                                                                                                                                                                                                                                                                                                                                                                                                                                                                   |                 |                          |                                                      |                                                                                                                                           |                         |                       |                   |
|---------------------------------|-------------------------------------------------------------------------------------------------|----------------------------------------------|---------------------------------------------------------------------------------------------------------------------------------------------------------------------------------------------------------------------------------------------------------------------------------------------------------------------------------------------------------------------------------------------------------------------------------------------------------------------------------------------------------------------------------------------------------------------------------------------------------------------------------------------------------------------------------------------------------------------------------------------------------------------------------------------------------------------------------------------------------------------------------------------------|-----------------|--------------------------|------------------------------------------------------|-------------------------------------------------------------------------------------------------------------------------------------------|-------------------------|-----------------------|-------------------|
|                                 | Type of intervention                                                                            | Materials & measurement tools used           | Procedure                                                                                                                                                                                                                                                                                                                                                                                                                                                                                                                                                                                                                                                                                                                                                                                                                                                                                         | People involved | Mode of delivery         | No. of sessions                                      | Schedule                                                                                                                                  | Duration of one session | Duration of follow up | Intensity or dose |
|                                 |                                                                                                 |                                              | cueing took the form of verbal and visual modeling and instruction concerning place, manner, and/or voicing; cues were specific to the articulatory error produced. Step 5: The SLP presented the next item. EPG The screen displayed side by side real time tongue to palate contact for the clinician and participant. During the treatment steps, the participant was able to observe the screen (i.e., during the clinician’s model of the target word or phrase). Participants were provided with knowledge of results                                                                                                                                                                                                                                                                                                                                                                       |                 |                          |                                                      |                                                                                                                                           |                         |                       |                   |
| Mauszycki, Wright, et al., 2016 | Articulatory kinematic treatment in conjunction with visual biofeedback via electropalatography | CDC method                                   | Appendix B                                                                                                                                                                                                                                                                                                                                                                                                                                                                                                                                                                                                                                                                                                                                                                                                                                                                                        | SLPs            | Individual, face-to-face | Mean of 8 sessions per phase range of 47-91 sessions | 3 times a week                                                                                                                            | 35 minutes              | 2,4, 8 weeks          | NR                |
| Mozeiko et al, 2019             | Sound Production Treatment                                                                      | Audio recorder                               | In the first step of this response-contingent treatment, the SLP says the word and requests a repetition of the target word. If correct, the participant is asked to repeat the word five more times and then the process is repeated with the next item. If incorrect, the SLP presents a minimal pair word. If production of the minimal pair is correct, the SLP then shows the participant the letter representing the target sound and again request a repetition of the word. If correct, the participant is asked to repeat it five times and then moves to the next item. If not, additional cues are provided including integral stimulation is used in which the participant is requested to “watch me, listen to me, and say it with me” and then articulatory placement cues. If, after all cues, the participant still cannot produce the target word, he is moved to the next item. | SLPs            | Individual, face-to-face | 10                                                   | From 9:00 AM-12:45 PM, weekdays, for 2 weeks resulting in a total of 30 treatment hours, after accounting for probes and one 15-min break | 3 hour                  | 4 & 10 weeks          | Intensive         |
| Preston & Leaman, 2014          | Ultrasound visual feedback                                                                      | Portable Seemore PI 7.5 MHz ultrasound probe | Ultrasound VBFB was paired with verbal articulatory placement instructions and clinician feedback. Six sessions were provided to the treatment of prevocalic rhotics and then for six sessions to postvocalic rhotics                                                                                                                                                                                                                                                                                                                                                                                                                                                                                                                                                                                                                                                                             | SLP             | Individual, face-to-face | 12                                                   | 2 sessions per week for 6 weeks                                                                                                           | 60 minutes              | 1 week                | NR                |
| Varley et al, 2016              | Self-administered computer therapy                                                              | Laptop                                       | Naming and repetition accuracy were measured as correct/incorrect                                                                                                                                                                                                                                                                                                                                                                                                                                                                                                                                                                                                                                                                                                                                                                                                                                 | SLPs            | Self-administration      | Varied                                               | Once or twice a day for 6                                                                                                                 | At least 20 minutes     | 8 weeks               | Determined by     |

| Study                           | Intervention characteristics |                                    |                                                                                                                                                                                                                                                                                                                                                                                                                                                                                                                                                                                                                                                                                                                                                                                                                                                                                                                                                                                                                                                                                                                                                       |                 |                          |                                        |                                                |                         |                                                        |                   |
|---------------------------------|------------------------------|------------------------------------|-------------------------------------------------------------------------------------------------------------------------------------------------------------------------------------------------------------------------------------------------------------------------------------------------------------------------------------------------------------------------------------------------------------------------------------------------------------------------------------------------------------------------------------------------------------------------------------------------------------------------------------------------------------------------------------------------------------------------------------------------------------------------------------------------------------------------------------------------------------------------------------------------------------------------------------------------------------------------------------------------------------------------------------------------------------------------------------------------------------------------------------------------------|-----------------|--------------------------|----------------------------------------|------------------------------------------------|-------------------------|--------------------------------------------------------|-------------------|
|                                 | Type of intervention         | Materials & measurement tools used | Procedure                                                                                                                                                                                                                                                                                                                                                                                                                                                                                                                                                                                                                                                                                                                                                                                                                                                                                                                                                                                                                                                                                                                                             | People involved | Mode of delivery         | No. of sessions                        | Schedule                                       | Duration of one session | Duration of follow up                                  | Intensity or dose |
|                                 |                              |                                    |                                                                                                                                                                                                                                                                                                                                                                                                                                                                                                                                                                                                                                                                                                                                                                                                                                                                                                                                                                                                                                                                                                                                                       |                 |                          |                                        | weeks for each phase Determined by participant |                         |                                                        | participant       |
| Wambaugh et al, 2016            | Sound Production Treatment   | CDC method                         | SPT is administered in the form of a response contingent hierarchy and includes the treatment ingredients of modeling/repetition, orthographic cueing, integral stimulation (“watch me, listen to me, say it with me”), articulatory cueing, feedback and repeated practice. SPT-B. For SPT-B, treatment was applied to each of the five words in a sub-set before treatment was applied with the other sub-set. Within sub-set, the words were presented in random order, but with blocking on each word. Specifically, the target word was submitted to the treatment hierarchy; upon a correct response, the same target word was resubmitted to the hierarchy. This process was repeated for a 5–6 minute period. Then, treatment was applied to the next target word for a 5–6 minute period and so on, until all five target words within the sub-set received treatment. The process was then repeated with the second sub-set of items. SPT-R. For SPT-R, grouping by sub-set was not used in presentation of treatment stimuli. All 10 treatment items (five words for each target) were presented in random order during a treatment trial. | SLPs            | Individual, face-to-face | P1,P2-20 sessions<br>P3,P4-40 sessions | 3 times per week                               | 50-60 minutes           | 2, 6 and 10 weeks following the second treatment phase | NR                |
| Wambaugh, Nessler, et al., 2014 | Sound Production Treatment   | Audio recorder                     | SPT is a response contingent hierarchy that includes the following steps: 1. The SLP provides a verbal model of the target word and requests a repetition. 2. The SLP indicates the printed letter(s) representing the target sound, instructs the participant to attend to this sound, provides another model, and requests a repetition. 3. The SLP says “watch me, listen to me, say it with me” (i.e., integral stimulation) and attempts simultaneous production for a maximum of three times. 4. The SLP provides articulatory placement cues appropriate to the sound production error and then repeats the procedures used in the previous step. 5. The SLP presents the next item.                                                                                                                                                                                                                                                                                                                                                                                                                                                           | SLPs            | Individual, face-to-face | 40                                     | 3 times per week                               | 50-60 minutes           | 2,6,10 weeks                                           | NR                |

| Study                 | Intervention characteristics |                                    |                                                                                                                                                                                                                                                                                                                                                                                                                                                                                                                                                                                                                                                                                                                                                                                                                                                                                                                                                                                                                                                                                                                                                                                                |                 |                          |                                                                                 |                                                                                                                             |                         |                       |                                         |
|-----------------------|------------------------------|------------------------------------|------------------------------------------------------------------------------------------------------------------------------------------------------------------------------------------------------------------------------------------------------------------------------------------------------------------------------------------------------------------------------------------------------------------------------------------------------------------------------------------------------------------------------------------------------------------------------------------------------------------------------------------------------------------------------------------------------------------------------------------------------------------------------------------------------------------------------------------------------------------------------------------------------------------------------------------------------------------------------------------------------------------------------------------------------------------------------------------------------------------------------------------------------------------------------------------------|-----------------|--------------------------|---------------------------------------------------------------------------------|-----------------------------------------------------------------------------------------------------------------------------|-------------------------|-----------------------|-----------------------------------------|
|                       | Type of intervention         | Materials & measurement tools used | Procedure                                                                                                                                                                                                                                                                                                                                                                                                                                                                                                                                                                                                                                                                                                                                                                                                                                                                                                                                                                                                                                                                                                                                                                                      | People involved | Mode of delivery         | No. of sessions                                                                 | Schedule                                                                                                                    | Duration of one session | Duration of follow up | Intensity or dose                       |
| Wambaugh et al., 2013 | Sound Production Treatment   | NR                                 | Each participant received treatment for four lists of experimental words with the following four permutations of treatment applied sequentially: (a) intense–random, (b) intense–blocked, (c) traditional– random, and (d) traditional–blocked.                                                                                                                                                                                                                                                                                                                                                                                                                                                                                                                                                                                                                                                                                                                                                                                                                                                                                                                                                | SLPs            | Individual, face-to-face | Each participant<br>Intensive phase 4 sessions<br>Traditional phase-16 sessions | Intensive-4 hours per day for 4 days per week for 1 week.<br>Traditional 1-1 hour per day for 3 days per week for 5.5 weeks | 50-60 minutes           |                       | Intensive and traditional/non-intensive |
| Wambaugh et al., 2017 | Sound Production Treatment   | NR                                 | Applied using a response contingent hierarchy as follows: 1. The speech language pathologist (SLP) produces a verbal model of the word or phrase and requests a repetition. When monosyllabic words are the treatment targets, sub steps are used for the purposes of contrastive practice upon an incorrect production (e.g., Wambaugh & Mauszycki, 2010; Wambaugh & Nessler, 2004). When multisyllabic words are the target, then contrastive practice is not used and the next step is attempted. 2. The SLP uses printed letters or words to indicate the sound in error, directs the participant to attend to the target sound, provides another verbal model, and requests a repetition. 3. The SLP uses integral stimulation—“watch me, listen to me, say it with me”—and attempts simultaneous production until a correct production is achieved, with a maximum of three attempts. When a phrase is used, the entire phrase is attempted. 4. The SLP provides articulatory cueing appropriate for the sound production error and then repeats the procedures used in the previous step. Only the target word is practiced (not the entire phrase). 5. The SLP presents the next item. | SLPs            | Individual, face-to-face | P5, P15-10 sessions per phase<br>others-20 sessions per phase                   | 3 times per week                                                                                                            | 50–60 minutes           | 2,6, 10 weeks         | NR                                      |
| Wambaugh et al., 2021 | Sound Production Treatment   | NR                                 | Applied using a response contingent hierarchy as follows: 1. The speech language pathologist (SLP) produces a verbal model of the word or phrase and requests a repetition. When monosyllabic words are the treatment targets, sub steps are used for the purposes of contrastive practice upon an incorrect production (e.g., Wambaugh & Mauszycki, 2010; Wambaugh & Nessler, 2004). When multisyllabic words are the target, then contrastive practice is not used, and the next step is attempted. 2. The SLP uses                                                                                                                                                                                                                                                                                                                                                                                                                                                                                                                                                                                                                                                                          | SLPs            | Individual, face-to-face | P5, P15 10 sessions per phase<br>others 20 sessions                             | 3 times per week                                                                                                            | 50–60 minutes           | 2,6, 10 weeks         | Dosage                                  |

| Study                                     | Intervention characteristics |                                    |                                                                                                                                                                                                                                                                                                                                                                                                                                                                                                                                                                                                                                                                                                                                                                                                                                                                                                                                                                                                                                                                                                                                                      |                 |                          |                                                  |                                                                                                                  |                         |                       |                                       |
|-------------------------------------------|------------------------------|------------------------------------|------------------------------------------------------------------------------------------------------------------------------------------------------------------------------------------------------------------------------------------------------------------------------------------------------------------------------------------------------------------------------------------------------------------------------------------------------------------------------------------------------------------------------------------------------------------------------------------------------------------------------------------------------------------------------------------------------------------------------------------------------------------------------------------------------------------------------------------------------------------------------------------------------------------------------------------------------------------------------------------------------------------------------------------------------------------------------------------------------------------------------------------------------|-----------------|--------------------------|--------------------------------------------------|------------------------------------------------------------------------------------------------------------------|-------------------------|-----------------------|---------------------------------------|
|                                           | Type of intervention         | Materials & measurement tools used | Procedure                                                                                                                                                                                                                                                                                                                                                                                                                                                                                                                                                                                                                                                                                                                                                                                                                                                                                                                                                                                                                                                                                                                                            | People involved | Mode of delivery         | No. of sessions                                  | Schedule                                                                                                         | Duration of one session | Duration of follow up | Intensity or dose                     |
|                                           |                              |                                    | printed letters or words to indicate the sound in error, directs the participant to attend to the target sound, provides another verbal model, and requests a repetition. 3. The SLP uses integral stimulation—“watch me, listen to me, say it with me”—and attempts simultaneous production until a correct production is achieved, with a maximum of three attempts. When a phrase is used, the entire phrase is attempted. 4. The SLP provides articulatory cueing appropriate for the sound production error and then repeats the procedures used in the previous step. Only the target word is practiced (not the entire phrase). 5. The SLP presents the next item.                                                                                                                                                                                                                                                                                                                                                                                                                                                                            |                 |                          | per phase                                        |                                                                                                                  |                         |                       |                                       |
| Wambaugh, Wright, Boss, et al., 2018      | Sound Production Treatment   | NR                                 | Step 1: The SLP provided a verbal-visual model of the word or phrase and requested a repetition. When monosyllabic words were the treatment targets, sub steps of Step 1 were used for the purposes of contrastive practice on an incorrect production. If multisyllabic words were the target, then contrastive practice was not used, and the next step was attempted. Step 2: The SLP used printed letters/words to identify the sound in error, instructed the participant to focus on the target sound, provided another verbal model, and requested a repetition. Step 3: The SLP used integral stimulation—“watch me, listen to me, say it with me”—to elicit simultaneous production with a maximum of three attempts to elicit a correct production. Step 4: The SLP provided articulatory cueing appropriate for the sound production error and then repeated the procedures used in the previous step. Articulatory cueing took the form of verbal and visual modeling and instruction concerning the place and/or manner and/or voicing; cues were specific to the articulatory error produced. Step 5: The SLP presented the next item. | SLPs            | Individual, face-to-face | Intensive-27 sessions<br>Traditional-27 sessions | SPT-I 3 sessions per day 3 days per week for 3 weeks<br>SPT-T 1 session per day for 3 times per week for 9 weeks | 50-60 minutes           | 2 and 8 week          | Intense and traditional/non-intensive |
| Wambaugh, Wright, Mauszycki, et al., 2018 | CAAST                        | Audio recorder                     | CAAST treatment protocol with modifications. Modifications include (1) eight picture stimuli were used per session instead of 10 to allow for more time for SPT and for generalization practice; (2) SPT was completed one additional time with each elaborated utterance. In the initial study (Wambaugh et al., 2014), a second application of SPT with each elaborated utterance was conducted only when time permitted (which tended to be infrequently; and (3) one picture was presented a second time each session for the purpose of practicing generalization                                                                                                                                                                                                                                                                                                                                                                                                                                                                                                                                                                               | SLPs            | Individual, face-to-face | P1,3,4-40<br>P2-60                               | 3 times per week                                                                                                 | 60-75 minutes           | 2 & 6weeks            | NR                                    |

| Study                          | Intervention characteristics |                                    |                                                                                                                                                                                                                                                                                                                                                                                                                                                                                                                                                                                                                                                                                                                                                                                                                                                                                                                                                                                                                                                                                                                                                            |                                 |                          |                    |                                                                      |                         |                       |                                      |
|--------------------------------|------------------------------|------------------------------------|------------------------------------------------------------------------------------------------------------------------------------------------------------------------------------------------------------------------------------------------------------------------------------------------------------------------------------------------------------------------------------------------------------------------------------------------------------------------------------------------------------------------------------------------------------------------------------------------------------------------------------------------------------------------------------------------------------------------------------------------------------------------------------------------------------------------------------------------------------------------------------------------------------------------------------------------------------------------------------------------------------------------------------------------------------------------------------------------------------------------------------------------------------|---------------------------------|--------------------------|--------------------|----------------------------------------------------------------------|-------------------------|-----------------------|--------------------------------------|
|                                | Type of intervention         | Materials & measurement tools used | Procedure                                                                                                                                                                                                                                                                                                                                                                                                                                                                                                                                                                                                                                                                                                                                                                                                                                                                                                                                                                                                                                                                                                                                                  | People involved                 | Mode of delivery         | No. of sessions    | Schedule                                                             | Duration of one session | Duration of follow up | Intensity or dose                    |
| Wambaugh, Wright, et al., 2014 | CAAST                        | NR                                 | Step 1: Therapist-Presents action picture and says, “Tell me anything about this picture; what does it remind you of? what’s happening?” Participant-No response. Therapist-“You could say something like man spills ... or ... drops a cup.” Participant-“Spill.” Step 2: Therapist-“Spill, great.” Referring to the sentence frame, asks participant to indicate where to write “spill.” Step 3: Therapist-“What does the man spill?” Participant-“Milk.” Step 4: Therapist-“Milk, good, spill milk.” Referring to the sentence frame, asks the participant where to write “milk.” Step 5A: Therapist-“Repeat after me ... spill milk.” Participant-“Pill milk.” Step 5B: Therapist-“Good try, but not quite correct. Let’s concentrate on this sound (underlines the “s” on the sentence frame) and try again ... spill milk.” Participant-“Spill milk.” Therapist-“That’s right. Now, let’s say it three more times.” Step 6: Therapist-Removes the picture and imposes a 5 s delay (e.g., “Wait and then I’m going to ask you to say it again”). Participant-“Milk.” Therapist-“Good try, but not quite. Watch me and try it with me ... spill milk.” | SLPs                            | Individual, face-to-face | P1-28<br>P2,3,4-40 | 3 times per week                                                     | 60-75 minutes           | 2 and 6 weeks         | NR                                   |
| Wambaugh et al., 2020          | Sound Production Treatment   | NR                                 | The SPT hierarchy was applied to each treatment item as often as possible in a treatment session. The 30 treatment items were presented in a blocked manner; all 10 items for one sound target were presented (in random order), then all 10 items of another target, and then all 10 items of the remaining target (order of the three sound target groups was randomized). Blocking of sounds continued until at least 70% of the items within each group were produced accurately at Step 1. Then, the remaining trials for the session were alternated between random presentation (all 30 treatment items were presented in a non-predictable order) and blocked presentation. Alternating between blocked and random was continued as long as the 70% criterion was met on the blocked trials. If less than 70% of the items were produced correctly at Step 1, then blocked presentation continued on all trials until this criterion was reached again.                                                                                                                                                                                            | SLPs                            | Individual, face-to-face | 27 per phase       | SPT-T =27 sessions over 9 weeks vs. SPT-I = 27 sessions over 3 weeks | 50-60 minutes           | 2 and 8 weeks         | Traditional/ non-intense and intense |
| Zumbansen et al, 2014          | Melodic intonation therapy   | NR                                 | Participants had to listen and produce 20 phrases, each following a progressive procedure in four steps: two times in unison, two times in unison with therapist fading out at half-way, one time in repetition alone, and finally alone in response to a question. Half of the sentences were New-phrases ranging from two to eight syllables (one phrase of two, three, seven, and eight syllables and two of four, five,                                                                                                                                                                                                                                                                                                                                                                                                                                                                                                                                                                                                                                                                                                                                | Trained graduate student in SLP | Individual, face-to-face | 18                 | 3 one-hour sessions/ week for 6weeks                                 | 1 hour                  | NR                    | NR                                   |

| Study | Intervention characteristics |                                    |                                                                                                                                                                                                                                                                                                                                                                                                                                                                                                                                                                                                                                                                                                                                     |                 |                  |                 |          |                         |                       |                   |
|-------|------------------------------|------------------------------------|-------------------------------------------------------------------------------------------------------------------------------------------------------------------------------------------------------------------------------------------------------------------------------------------------------------------------------------------------------------------------------------------------------------------------------------------------------------------------------------------------------------------------------------------------------------------------------------------------------------------------------------------------------------------------------------------------------------------------------------|-----------------|------------------|-----------------|----------|-------------------------|-----------------------|-------------------|
|       | Type of intervention         | Materials & measurement tools used | Procedure                                                                                                                                                                                                                                                                                                                                                                                                                                                                                                                                                                                                                                                                                                                           | People involved | Mode of delivery | No. of sessions | Schedule | Duration of one session | Duration of follow up | Intensity or dose |
|       |                              |                                    | and six syllables), beginning with the shortest and progressing on to the longest sentences. The other half were Test-phrases repeatedly trained at each session to ultimately assess the direct effect of the treatment. The stimuli were first heard from an iPod connected to speakers and immediately reproduced by the therapist to allow lip-reading. Up to four attempts were allowed in the steps where unison was used. If the participant still failed to produce the phrase successfully, the item was discontinued and the next phrase was presented. When errors occurred at the two last steps, the preceding step was reintroduced before trying again and if this second attempt failed, the item was discontinued. |                 |                  |                 |          |                         |                       |                   |



### Data extraction sheet 3: Conclusion, strengths and limitations and funding source

| Study                 | Conclusion and any other special information                                                                                                                                                                                                                                                                                 | Strengths & limitations of the studies                                                                                                                                                                                                                                                                                  | Funding source                                                                                                                                                                                                                                                       |
|-----------------------|------------------------------------------------------------------------------------------------------------------------------------------------------------------------------------------------------------------------------------------------------------------------------------------------------------------------------|-------------------------------------------------------------------------------------------------------------------------------------------------------------------------------------------------------------------------------------------------------------------------------------------------------------------------|----------------------------------------------------------------------------------------------------------------------------------------------------------------------------------------------------------------------------------------------------------------------|
| Ballard et al., 2019  | All participants showed immediate gain in accuracy of single word production, and a good maintenance for 1 month. 1 person showed less improvements. This approach aids in providing high intensity practice supporting self-administration of speech therapy sessions.                                                      | Limitations- Small scale study. Only 124 words were used. Accuracy of ASR may be reduced as dictionary contains more similar words Only single words were tested                                                                                                                                                        | National Health and Medical Research Council Grant 630489 and Australian Research Council Future Fellowship awarded to K. J. Ballard (FT120100355) and an Endeavour Postdoctoral Fellowship and Pennsylvania State University faculty funding awarded to N. M. Etter |
| Bislick, 2020         | One showed improvements in trained targets, response generalization and maintenance of treatment outcomes (accuracy of phoneme production) and other one's varied. The modified version of PMT can be used with people with AOS and aphasia.                                                                                 | Limitations- Less generalizability due to small sample size. One participant left the study prior to the end of treatments. A Large number of treatment sessions had been needed to generate restricted treatment effects. Student research assistants were not blinded to the purpose of the study or the study phase. | VPR Advancement of Early Career Researchers Award through the College of Health and Public Affairs at the University of Central Florida                                                                                                                              |
| Bislick et al., 2014  | Participant showed positive improvements, response generalization and maintenance of treatment effects (accuracy of phoneme production). But results are less generalizable. It is suggested the treatment facilitates speech motor learning in individuals with AOS.                                                        | Limitations- Lack of experimental control AB design. Not a multiple baseline design                                                                                                                                                                                                                                     | None                                                                                                                                                                                                                                                                 |
| Farias et al., 2014   | Participant showed positive effects on trained targets, response generalization and maintenance of treatment outcomes (accuracy in complex consonant blends and simpler consonant blends). Activation of neural areas were observed. Suggest implicit phoneme manipulation approach as an additional method in treating AOS. | Limitations- Lack of a counterbalanced condition. The participant was aware that the treatment tasks were designed to improve his speech.                                                                                                                                                                               | None                                                                                                                                                                                                                                                                 |
| Haley et al., 2021    | Participant showed improvements in treated targets (production accuracy of words) was observed. ActionSC treatment can be effective and can be applied in treating people with AOS.                                                                                                                                          | Limitations- This was a preliminary study of the first phase of a program that is still under development. Systematic replication was not conducted. Only one participant was used. Participant's personalities may be the reason for the positive results.                                                             | None                                                                                                                                                                                                                                                                 |
| Hurkmans et al., 2015 | SMTA improved both articulation and communication in daily life. It also reduced the severity of aphasia. SMTA seems an effective treatment to treat AOS.                                                                                                                                                                    | Limitations- Small sample size The gold standard for treatment research is that the treatment under investigation is compared to a control condition (e.g., no treatment). In the SMTA study, control was included by adding                                                                                            | None                                                                                                                                                                                                                                                                 |

| Study                            | Conclusion and any other special information                                                                                                                                                                                                                                                                                                                                                                                                                                                       | Strengths & limitations of the studies                                                                    | Funding source                                                          |
|----------------------------------|----------------------------------------------------------------------------------------------------------------------------------------------------------------------------------------------------------------------------------------------------------------------------------------------------------------------------------------------------------------------------------------------------------------------------------------------------------------------------------------------------|-----------------------------------------------------------------------------------------------------------|-------------------------------------------------------------------------|
|                                  |                                                                                                                                                                                                                                                                                                                                                                                                                                                                                                    | multiple baseline measurements and including related and unrelated control tests.                         |                                                                         |
| Johnson, 2018                    | Participant showed improvements in retention measures for treated words/phrases practiced low dose (therapy only) condition and high dose (therapy+ self-controlled practice) but no generalization. Fewer no. of targets resulted in improvements for treated, generalization and maintenance. The study supports the evidence to prove the effectiveness of MLG treatment on AOS.                                                                                                                | Limitations- Use of only three baseline measures in both participants                                     | None                                                                    |
| Johnson, Lasker, et al., 2018    | Participant showed improvements for all trained phrases only with MLG treatment, maintenance 6 mo. post-treatment. Fewer sessions were required to meet the mastery criterion for high dose (therapy+ self-controlled practice) condition than low dose (therapy only) condition and untrained (after training began). The study contributes to the evidence supporting MLG treatment.                                                                                                             | NR                                                                                                        | None                                                                    |
| Johnson, Lott, et al., 2018      | Accuracy of word production in treated phrases and maintenance effects were identified through approach. Both qualitative and quantitative measures are recommended to use when measuring improvements from the intervention.                                                                                                                                                                                                                                                                      | Limitations- Small sample size                                                                            | None                                                                    |
| Jungblut et al., 2014, Germany   | While imaging data yielded either no significant activation or right hemisphere activation before therapy, significant activation in perilesional regions was identified for all chronic patients after therapy. Participants with global aphasia indicated brain activation in homologous areas in the right hemisphere too. Speech and language improvements were observed in all cases. The intervention indicates reorganization through brain activation in individuals with AOS and aphasia. | NR                                                                                                        | Gebrüder Werner Stiftung                                                |
| Marangolo et al., 2013           | Upon bihemispheric tDCS, participants exhibited a significant recovery not only in terms of better accuracy and speed in articulating the treated stimuli but also in other language tasks (picture description, noun and verb naming, word repetition, word reading) which persisted in the follow-up session. Bihemispheric stimulation is a useful tool in treating individuals with AOS.                                                                                                       | NR                                                                                                        | None                                                                    |
| Mauszycki, Nessler, et al., 2016 | Both participants had modest gains in articulatory accuracy for treated and generalization stimuli. Further research is recommended to investigate the effect of MIT on speech and language. Further studies are required to examine the efficacy of MIT for individuals with AOS and aphasia.                                                                                                                                                                                                     | NR                                                                                                        | Department of Veterans Affairs, Rehabilitation Research and Development |
| Mauszycki & Wambaugh, 2020       | Both approaches improve the production accuracy in treated behaviors (accuracy of phonemes), response generalization and maintenance, but the gains are greater for SPT. Further research is needed with larger sample.                                                                                                                                                                                                                                                                            | Limitations- Small sample size, participant 1 was unable to fully participate in both treatment protocols | None                                                                    |
| Mauszycki, Wright, et al., 2016  | Positive acquisition of treated items (accuracy of phonemes) by all, 50% showed response generalization and superior maintenance.                                                                                                                                                                                                                                                                                                                                                                  | NR                                                                                                        | None                                                                    |

| Study                           | Conclusion and any other special information                                                                                                                                                                                          | Strengths & limitations of the studies                                                                                                                                                                                                                                                                                                                                                                                                                                                                                                                                                                                                                                                                                                                                                                                                                                                                                                                                                                                                                                                                                                                                                                                                                                                                                    | Funding source                                             |
|---------------------------------|---------------------------------------------------------------------------------------------------------------------------------------------------------------------------------------------------------------------------------------|---------------------------------------------------------------------------------------------------------------------------------------------------------------------------------------------------------------------------------------------------------------------------------------------------------------------------------------------------------------------------------------------------------------------------------------------------------------------------------------------------------------------------------------------------------------------------------------------------------------------------------------------------------------------------------------------------------------------------------------------------------------------------------------------------------------------------------------------------------------------------------------------------------------------------------------------------------------------------------------------------------------------------------------------------------------------------------------------------------------------------------------------------------------------------------------------------------------------------------------------------------------------------------------------------------------------------|------------------------------------------------------------|
|                                 | Results suggest people with AOS may benefit from VBFB+ SPT.<br>Further studies are warranted.                                                                                                                                         |                                                                                                                                                                                                                                                                                                                                                                                                                                                                                                                                                                                                                                                                                                                                                                                                                                                                                                                                                                                                                                                                                                                                                                                                                                                                                                                           |                                                            |
| Mozeiko et al., 2019            | Participant showed positive results on acquisition, generalization and maintenance.<br>Findings support the use of massed practice in treatment sessions.                                                                             | Limitations- Generalization of findings to the larger population of individuals with AOS.<br>The appearance of loss of experimental control given the rising probes prior to treatment of lists 2–4.                                                                                                                                                                                                                                                                                                                                                                                                                                                                                                                                                                                                                                                                                                                                                                                                                                                                                                                                                                                                                                                                                                                      | None                                                       |
| Preston & Leaman, 2014          | Acquisition was observed for both rhotics. Generalization and retention were identified for postvocalic rhotics.<br>Results support the feasibility of using ultrasound VBFB on treating individuals with AOS.                        | Limitations- Because this is a single case study, determining the specific elements of the treatment program that facilitated improvement is challenging.<br>It is possible that adapting the treatment protocol to transition from a focus on acquisition to a focus on motor learning could help to aid learning earlier in the process. For example, the feedback type and feedback frequency were designed to facilitate acquisition initially (high-frequency feedback with KP when working at the syllable level) with a transition to motor learning at more complex levels (low frequency with KR at the phrase level); however, it is possible that this procedure may have hindered learning and generalization, as fewer practice trials were achieved when high-frequency feedback was provided.<br>The present study used a consultative model in a real clinical situation to implement the visual feedback. Therefore, the treating clinician had only minimal training in ultrasound.<br>The participant in the study had AOS with concomitant residual aphasia. Because of her strong language comprehension, she was able to follow instructions well and to monitor her errors. Thus, ultrasound visual feedback is not necessarily appropriate for all patients with speech problems following a CVA. | Southern Connecticut State University/AAUP research grant. |
| Varley et al., 2016             | With speech program- Improvements and large maintenance in naming and repetition.<br>This computer based self-administered therapy is beneficial in providing intense treatments.                                                     | NR                                                                                                                                                                                                                                                                                                                                                                                                                                                                                                                                                                                                                                                                                                                                                                                                                                                                                                                                                                                                                                                                                                                                                                                                                                                                                                                        | Bupa UK Foundation specialist grant program                |
| Wambaugh et al., 2016           | Both SPT- blocked and SPT- random cause in improvements in treated items (accuracy of phonemes or clusters in multisyllabic words), some may benefit more for maintenance with random schedule.<br>Large scale studies are warranted. | Limitations- control of various aspects of the stimuli<br>Small sample size                                                                                                                                                                                                                                                                                                                                                                                                                                                                                                                                                                                                                                                                                                                                                                                                                                                                                                                                                                                                                                                                                                                                                                                                                                               | None                                                       |
| Wambaugh, Nessler, et al., 2014 | Both SPT-blocked and SPT-random cause in improvements in treated items and generalization (accuracy in phonemes).<br>Some may benefit through SPT-random.                                                                             | NR                                                                                                                                                                                                                                                                                                                                                                                                                                                                                                                                                                                                                                                                                                                                                                                                                                                                                                                                                                                                                                                                                                                                                                                                                                                                                                                        | None                                                       |
| Wambaugh et al., 2013           | Results suggest that the similar outcomes are obtained in terms of acquisition, generalization and maintenance of treatment targets (accuracy of words) regardless of the variation of treatment intensity or practice schedules.     | NR                                                                                                                                                                                                                                                                                                                                                                                                                                                                                                                                                                                                                                                                                                                                                                                                                                                                                                                                                                                                                                                                                                                                                                                                                                                                                                                        | None                                                       |
| Wambaugh et al., 2017           | Improvements in treated items (production accuracy in phonemes), generalization and maintenance were present for both practice schedules. Gains in treated items and maintenance was greater for SPT random.                          | NR                                                                                                                                                                                                                                                                                                                                                                                                                                                                                                                                                                                                                                                                                                                                                                                                                                                                                                                                                                                                                                                                                                                                                                                                                                                                                                                        | None                                                       |

| Study                                     | Conclusion and any other special information                                                                                                                                                                                                                                                                                                                                                                                          | Strengths & limitations of the studies                                                                                                                                                                                                                          | Funding source                                                                                                                                                                                                                                                                                                                                                                                |
|-------------------------------------------|---------------------------------------------------------------------------------------------------------------------------------------------------------------------------------------------------------------------------------------------------------------------------------------------------------------------------------------------------------------------------------------------------------------------------------------|-----------------------------------------------------------------------------------------------------------------------------------------------------------------------------------------------------------------------------------------------------------------|-----------------------------------------------------------------------------------------------------------------------------------------------------------------------------------------------------------------------------------------------------------------------------------------------------------------------------------------------------------------------------------------------|
| Wambaugh et al., 2021                     | Changes in the accuracy of articulation needed only few sessions, mastery needed 12-14 sessions.                                                                                                                                                                                                                                                                                                                                      | NR                                                                                                                                                                                                                                                              | None                                                                                                                                                                                                                                                                                                                                                                                          |
| Wambaugh, Wright, Boss, et al., 2018      | Improvements in treated items (production accuracy of phonemes) and response generalization were present for all regardless of the intensity. Maintenance effects were greater for traditional.<br>Patients with AOS may benefit more from traditional than intense.                                                                                                                                                                  | NR                                                                                                                                                                                                                                                              | None                                                                                                                                                                                                                                                                                                                                                                                          |
| Wambaugh, Wright, Mauszycki, et al., 2018 | Improvements in speech production for trained items has increased compared with the previous study on CAAST.<br>Further development in CAAST is recommended.                                                                                                                                                                                                                                                                          | Limitations- Fatigue associated with higher dose frequency may have impacted the findings                                                                                                                                                                       | None                                                                                                                                                                                                                                                                                                                                                                                          |
| Wambaugh, Wright, et al., 2014            | Gain in speech production varied across participants.<br>Therefore, suggested further development of the CAAST approach.                                                                                                                                                                                                                                                                                                              | NR                                                                                                                                                                                                                                                              | None                                                                                                                                                                                                                                                                                                                                                                                          |
| Wambaugh et al., 2020                     | Improvements in treated items (production accuracy of phonemes) and generalization were present irrespective of the intensity; and majority showed large maintenance effects for both traditional and intense practice.<br>People with AOS may benefit from both intense and traditional practice                                                                                                                                     | Limitations- The finding that only very few investigations were designed to address activity/participation and contextual factors is still pertinent at this time Restriction of the number of initial baseline probe sessions to three probes per participant. | None                                                                                                                                                                                                                                                                                                                                                                                          |
| Zumbansen et al, 2014                     | The three interventions (MIT, rhythmic only, and normally spoken treatments) all improved speech accuracy in trained sentences, but the MIT (combination of rhythm and pitch) elicited the strongest generalization effect both to untreated stimuli and connected speech.<br>No significant change was measured in motor-speech agility with either treatment<br>Combination of rhythm and pitch can bring beneficial effect of MIT. | NR                                                                                                                                                                                                                                                              | Centre for Research on Brain, Language and Music (CRBLM) and by scholarships to Anna Zumbansen from the Collaborative Research and Training Experience (CREATE) Program in Auditory Cognitive Neuroscience from the Natural Sciences and Engineering Research Council of Canada (NSERC), the Quebec Bio-Imaging Network (QBIN), and the Faculty of Graduate Studies of Université de Montréal |

SCED = Single case experimental design; AOS = Apraxia of speech; M = Male; F = Female; L/CVA = Left cerebral vascular accident; R/CVA = Right cerebral vascular accident; P = Participant; DIAS = Diagnostic Instrument of Apraxia of Speech; NR = Not reported; GSW = Gunshot wound; RCT = Randomized controlled trial; ASRS = Apraxia of Speech Rating Scale; ASR = Automatic speech recognition; SLP = Speech-language pathologist; C = Consonant; V=Vowel; ActionSC treatment = Action for Speech and Communication treatment; SMTA = Speech–Music Therapy for Aphasia; MLG treatment=Motor learning guided treatment; EPG = Electropalatography; VFBF = Visual biofeedback; CAAST = Combined Aphasia and Apraxia of Speech Treatment; MIT = Melodic intonation therapy; tDCS = Transcranial direct current stimulation; SML = Speech motor learning; SPT = Sound Production Treatments; B = Blocked; R = Random; I = Intense; T = Traditional; PMT = Phonomotor Treatment
