# Supplementary material
Source: publisher figshare collection journal article supplement (https://asha.figshare.com/articles/dataset/_/22223785)
Supplement: Supplementary file 3 [file 1]

## Supplemental Material S2. Search strategies for databases.

### PubMed search strategy

|    |                                                                                                                                                                                                                                                                                                                                                                                                                                    |
|----|------------------------------------------------------------------------------------------------------------------------------------------------------------------------------------------------------------------------------------------------------------------------------------------------------------------------------------------------------------------------------------------------------------------------------------|
| #1 | "apraxias"[MeSH Terms] OR "dyspraxia*"[Title/Abstract] OR<br>"apraxia*"[Title/Abstract] OR "articulatory apraxia*"[Title/Abstract] OR<br>"articulatory dyspraxia*"[Title/Abstract] OR "verbal apraxia*"[Title/Abstract]<br>OR "verbal dyspraxia*"[Title/Abstract] OR "Apraxia of<br>Phonation"[Title/Abstract] OR "Apraxia of speech"[Title/Abstract] OR<br>"Acquired apraxia"[Title/Abstract] OR "Speech apraxia"[Title/Abstract] |
| #2 | "speech therapy"[MeSH Terms] OR "rehabilitation"[MeSH Terms] OR<br>"rehabilitation"[MeSH Subheading] OR "therapy"[MeSH Subheading] OR<br>"rehabilitat*"[Title/Abstract] OR "speech therap*"[Title/Abstract] OR "speech<br>treat*"[Title/Abstract] OR "speech intervention*"[Title/Abstract] OR "language<br>intervention*"[Title/Abstract] OR "language therap*"[Title/Abstract] OR<br>"language treatment*"[Title/Abstract]       |
| #3 | #1 AND #2                                                                                                                                                                                                                                                                                                                                                                                                                          |

### The Cochrane library search strategy

| ID  | Search Hits                                                             |
|-----|-------------------------------------------------------------------------|
| #1  | MeSH descriptor: [Apraxias] explode all trees                           |
| #2  | MeSH descriptor: [Speech Disorders] this term only                      |
| #3  | (apraxia*):ti,ab,kw                                                     |
| #4  | (dyspraxia*):ti,ab,kw                                                   |
| #5  | (verbal near apraxia):ti,ab,kw                                          |
| #6  | (verbal near dyspraxia):ti,ab,kw                                        |
| #7  | (apraxia near speech):ti,ab,kw                                          |
| #8  | ("speech apraxia"):ti,ab,kw                                             |
| #9  | ("acquired apraxia"):ti,ab,kw                                           |
| #10 | (speech near/3 disorder*):ti,ab,kw                                      |
| #11 | (speech near/3 impair*):ti,ab,kw                                        |
| #12 | (speech near/3 problem*):ti,ab,kw                                       |
| #13 | #1 OR #2 OR #3 OR #4 OR #5 OR #6 OR #7 OR #8 OR #9 OR #10 OR #11 OR #12 |

- #14 MeSH descriptor: [Rehabilitation of Speech and Language Disorders] explode all trees
- #15 (speech near/3 therap\*):ti,ab,kw
- #16 (speech near/3 rehabilitat\*):ti,ab,kw
- #17 (speech near/3 intervention\*):ti,ab,kw
- #18 (speech near/3 treat\*):ti,ab,kw
- #19 (language next therap\*):ti,ab,kw
- #20 (language next treat\*):ti,ab,kw
- #21 (language next intervention\*):ti,ab,kw
- #22 #14 OR #15 OR #16 OR #17 OR #18 OR #19 OR #20 OR #21
- #23 #13 AND #22

### **Web of Science search strategy**

|    |                                                                                                                                                                                                                                                                                                   |
|----|---------------------------------------------------------------------------------------------------------------------------------------------------------------------------------------------------------------------------------------------------------------------------------------------------|
| #1 | TS= apraxia\$ or dyspraxia\$ or "verbal apraxia\$" or "verbal dyspraxia\$" or "apraxia of speech" or "acquired apraxia" or "speech apraxia" or "articulatory apraxia\$" or "articulatory dyspraxia\$" or "phonation apraxia" or "apraxia of phonation" or "speech disorder\$" or speech problem\$ |
| #2 | TS= speech NEAR/3 therap* or therap* or rehabilitat* or intervention\$ or "speech treat*" or "speech intervention\$" or "language therap*" or "language intervention\$" or "language treat*"                                                                                                      |
| #3 | #1 AND #2                                                                                                                                                                                                                                                                                         |

### **Scopus search strategy**

|    |                                                                                                                                                                                                                                                           |
|----|-----------------------------------------------------------------------------------------------------------------------------------------------------------------------------------------------------------------------------------------------------------|
| #1 | (TITLE-ABS-KEY (apraxia*) OR TITLE-ABS-KEY (dyspraxia*) OR TITLE-ABS-KEY ("articulatory apraxia*") OR TITLE-ABS-KEY ("articulatory dyspraxia*") OR TITLE-ABS-KEY ("verbal apraxia*") OR TITLE-ABS-KEY ("verbal dyspraxia*") OR TITLE-ABS-KEY ("apraxia of |
|----|-----------------------------------------------------------------------------------------------------------------------------------------------------------------------------------------------------------------------------------------------------------|

|    |                                                                                                                                                                                                                                                                                                       |
|----|-------------------------------------------------------------------------------------------------------------------------------------------------------------------------------------------------------------------------------------------------------------------------------------------------------|
|    | phonation") OR TITLE-ABS-KEY ("apraxia of speech") OR TITLE-ABS-KEY ("acquired apraxia of speech") OR TITLE-ABS-KEY ("speech apraxia")                                                                                                                                                                |
| #2 | TITLE-ABS-KEY (rehabilitat*) OR TITLE-ABS-KEY (speech W/3 therap*) OR TITLE-ABS-KEY ("speech treat*") OR TITLE-ABS-KEY ("speech intervention*") OR TITLE-ABS-KEY ("language intervention*") OR TITLE-ABS-KEY ("language therap*") OR TITLE-ABS-KEY ("language treatment*") OR TITLE-ABS-KEY (therap*) |
| #3 | #1 AND #2                                                                                                                                                                                                                                                                                             |

### **EBSCOhost search strategy**

|    |                                                                                                                                                                                                                                                                                                         |
|----|---------------------------------------------------------------------------------------------------------------------------------------------------------------------------------------------------------------------------------------------------------------------------------------------------------|
| S1 | SU speech apraxia OR TI "speech apraxia" OR TI apraxia* OR TI dyspraxia* OR TI "verbal dyspraxia*" OR TI "verbal apraxia*" OR TI "articulatory apraxia*" OR TX articulatory dyspraxia* OR TI phonation apraxia* OR TI apraxia of phonation OR TI "apraxia of speech" OR TI "acquired apraxia of speech" |
| S2 | SU speech therapy OR SU rehabilitation OR SU therapeutics OR TI "speech therap*" OR TI "speech treat*" OR TI rehabilitat* OR TI therap* OR TI "speech intervention*" OR TI "language therap*" OR TI "language intervention*" OR TI "language treatment*"                                                |
| S3 | S1 AND S2                                                                                                                                                                                                                                                                                               |

### **CINAHL search strategy**

|    |                                                                                                                                                    |
|----|----------------------------------------------------------------------------------------------------------------------------------------------------|
| S1 | SU speech apraxia                                                                                                                                  |
| S2 | TI "speech apraxia" or apraxia* or dyspraxia* or "verbal dyspraxia*" or "verbal apraxia*" or "articulatory apraxia*" or articulatory dyspraxia* or |

|    |                                                                                                                                                                        |
|----|------------------------------------------------------------------------------------------------------------------------------------------------------------------------|
|    | phonation apraxia* or apraxia of phonation or "apraxia of speech" or "acquired apraxia of speech"                                                                      |
| S3 | S1 OR S2                                                                                                                                                               |
| S4 | SU speech therapy or rehabilitation or therapeutics                                                                                                                    |
| S5 | TI "speech therapy" or "speech treat*" or rehabilitat* or therap* or "speech intervention*" or "language therap*" or "language intervention*" or "language treatment*" |
| S6 | S4 OR S5                                                                                                                                                               |
| S7 | S3 AND S6                                                                                                                                                              |
